# Supplementary material
Source: MDPI journal article supplement (https://www.mdpi.com/2624-781X/4/3/30)
Supplement: s1 [file s1]

## Article

# Full Factorial Design Synthesis of Silver Nanoparticles Using *Origanum vulgare*

Nickolas Rigopoulos <sup>1,\*</sup>, Christina Megetho Gkaliouri <sup>1</sup>, Viktoria Sakavitsi <sup>2</sup> and Dimitrios Gournis <sup>2</sup>

<sup>1</sup> Department of Food Science and Nutrition, University of the Aegean, Mitropolitou Ioakim 2, Myrina, 81400 Lemnos, Greece; fnsd21008@fns.aegean.gr

<sup>2</sup> Department of Materials Science and Engineering, University of Ioannina, 45110 Ioannina, Greece; viktoriasak@yahoo.gr (V.S.); dgourni@uoi.gr (D.G.)

\* Correspondence: nrigopoulos@aegean.gr

## Supporting Information

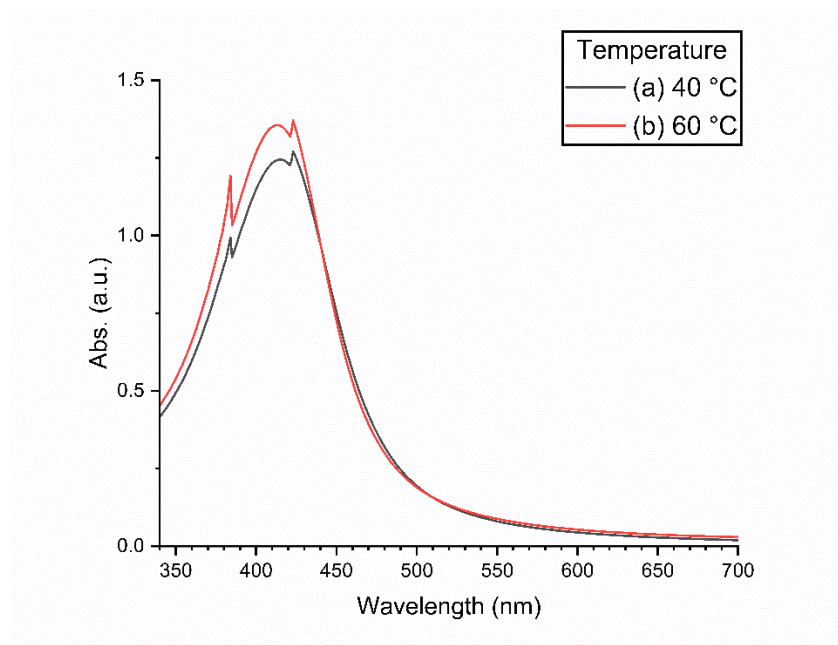

**Figure S1.** Effect of incubation temperature on UV – Vis spectra: (a) 40 °C, (b) 60 °C. AgNO<sub>3</sub> concentration 1 mM, OE concentration 2 % v/v, NaOH concentration 2mM, and incubation time 10 min.

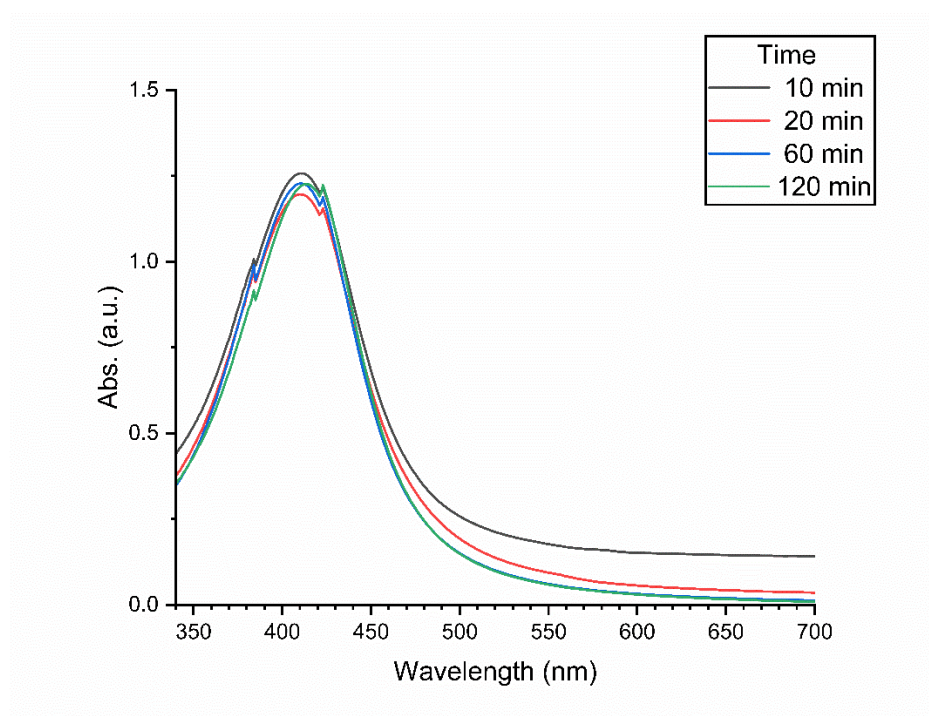

**Figure S2.** Effect of incubation time on UV – Vis spectra.  $\text{AgNO}_3$  concentration 1 mM, OE concentration 2 % v/v, NaOH concentration 2 mM, and incubation temperature 60 °C.

**Table S1.** Fitting parameters of a Voigt function ( $\lambda_0$ , A and FWHM) discussed in text, for UV – Vis spectra at different incubation temperatures and times.  $\text{AgNO}_3$  concentration 1 mM, OE concentration 2 % v/v, and NaOH concentration 2 mM.

| Temperature (°C) | Time (min) | $\lambda_0$ (nm) | A (a.u.) | FWHM (nm) |
|------------------|------------|------------------|----------|-----------|
| 40               | 10         | 410.9            | 156.5    | 95.3      |
|                  | 20         | 408.1            | 161.5    | 90.8      |
| 60               | 10         | 408.0            | 128.6    | 86.0      |
|                  | 20         | 407.8            | 148.4    | 90.0      |
|                  | 60         | 407.5            | 142.8    | 86.3      |
|                  | 120        | 409.5            | 143.6    | 86.0      |

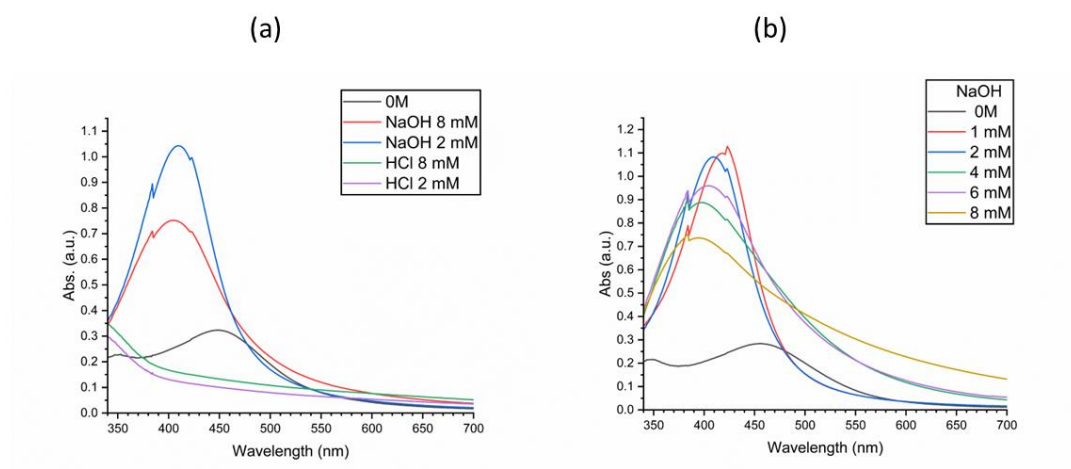

**Figure S3.** Effect of NaOH or HCl concentration on UV – Vis spectra. a) Coarse investigation, b) Fine tuning.  $\text{AgNO}_3$  concentration 1 mM, OE concentration 2 % v/v, incubation temperature 60 °C, and incubation time 1 h.

**Table S2.** Fitting parameters of a Voigt function ( $\lambda_0$ , A and FWHM) discussed in text, for UV – Vis spectra at different NaOH concentrations.  $\text{AgNO}_3$  concentration 1 mM, OE concentration 2 % v/v, incubation temperature 60 °C, and incubation time.

| NaOH concentration (mM) | $\lambda_0$ (nm) | A (a.u.) | FWHM (nm) |
|-------------------------|------------------|----------|-----------|
| 0                       | 466.5            | 14.7     | 92.4      |
| 1                       | 412.7            | 133.8    | 90.8      |
| 2                       | 406.9            | 134.3    | 91.1      |
| 4                       | 406.2            | 232.5    | 165.7     |
| 6                       | 406.3            | 213.3    | 142.8     |
| 8                       | 402.1            | 179.6    | 188.8     |

**Table S3.** Fitting parameters of a Voigt function ( $\lambda_0$ , A and FWHM) discussed in text, for UV – Vis spectra at different OE and  $\text{AgNO}_3$  concentrations. NaOH concentration 1 mM, incubation temperature 60 °C, and incubation time 1h.

| OE concentration (% v/v) | $\text{AgNO}_3$ concentration (mM) | $\lambda_0$ (nm) | A (a.u.) | FWHM (nm) |
|--------------------------|------------------------------------|------------------|----------|-----------|
| 0.8                      |                                    | 413.5            | 116.6    | 90.1      |
| 2                        | 1                                  | 412.5            | 143.6    | 92.6      |
| 4                        |                                    | 410.2            | 154.2    | 103.3     |
|                          | 0.5                                | 407.2            | 78.7     | 103.9     |
|                          | 1                                  | 410.2            | 119.2    | 95.5      |
| 2                        | 1.5                                | 414.9            | 151.9    | 95.9      |
|                          | 2                                  | 417.9            | 176.6    | 101.5     |

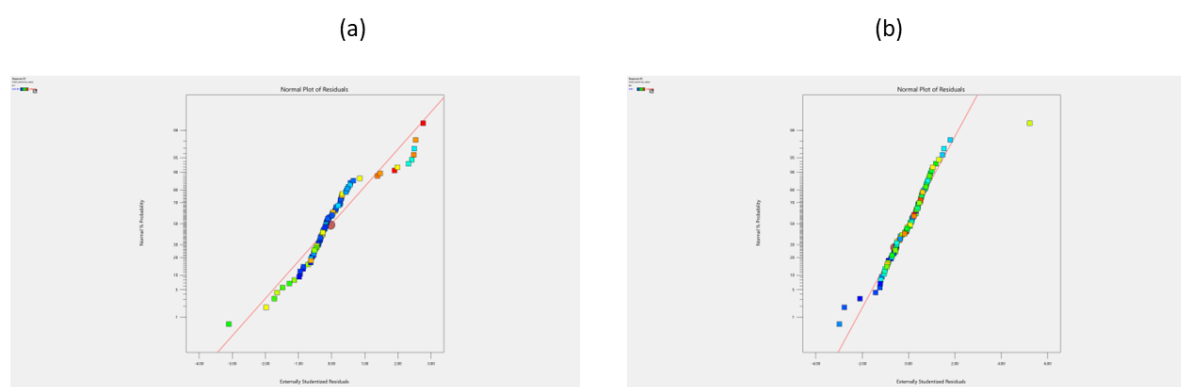

**Figure S4.** Normal probability plot of the residuals a) wavelength at peak maximum  $\lambda_0$ , and b) peak area A.

**Table S4.** Pareto analysis [1] for significant terms (p-value < 0.05) in quadratic model for particle size [2] and cubic model for the peak wavelength  $\lambda_0$  [3].

| Particle size <sup>[2]</sup>   |             | Peak wavelength $\lambda_0$ <sup>[3]</sup> |             |
|--------------------------------|-------------|--------------------------------------------|-------------|
| Term                           | Per. Ef (%) | Term                                       | Per. Ef (%) |
| AgNO <sub>3</sub>              | 0.39        | BPE                                        | 0.71        |
| GA                             | 2.44        | AgNO <sub>3</sub>                          | 1.25        |
| pH                             | 96.88       | time                                       | 0.11        |
| GA*pH                          | <0.01       | pH                                         | 10.45       |
| AgNO <sub>3</sub> <sup>2</sup> | <0.01       | BPE*pH                                     | 4.17        |
| GA <sup>2</sup>                | 0.01        | AgNO <sub>3</sub> *time                    | 0.99        |
| pH <sup>2</sup>                | 0.29        | AgNO <sub>3</sub> *pH                      | 1.10        |
| -                              | -           | BPE <sup>2</sup>                           | 12.75       |
| -                              | -           | BPE <sup>2</sup> *pH                       | 59.14       |
|                                |             | AgNO <sub>3</sub> *time*pH                 | 2.83        |

Per. Ef = Percentage Effect; AgNO<sub>3</sub> concentration; GA = Gallic Acid concentration; BPE = Banana Peel Extract concentration

## References

- [1] Asadzadeh, F.; Maleki-Kaklar, M.; Soiltanlinejad, N.; Shabani, F. Central Composite Design Optimization of Zinc Removal from Contaminated Soil, Using Citric Acid as Biodegradable Chelant. *Sci Rep*, **2018**, *8* (1). <https://doi.org/10.1038/s41598-018-20942-9>.
- [2] Ahani, M.; Khatibzadeh, M. Size Optimisation of Silver Nanoparticles Synthesised by Gallic Acid Using the Response Surface Methodology. *Micro Nano Lett*, **2020**, *15* (6), 403–408. <https://doi.org/10.1049/mnl.2019.0780>.
- [3] Rigopoulos, N.; Thomou, E.; Kouloumpis, A.; Lamprou, E. R.; Petropoulea, V.; Gournis, D.; Poullos, E.; Karantonis, H. C.; Giaouris, E. Optimization of Silver Nanoparticle Synthesis by Banana Peel Extract Using Statistical Experimental Design, and Testing of Their Antibacterial and Antioxidant Properties. *Curr Pharm Biotechnol*, **2019**, *20* (10), 858–873. <https://doi.org/10.2174/1389201020666181210113654>.
